# Supplementary material for: Tuning triboelectric and energy harvesting properties of dielectric elastomers via dynamic ionic crosslinks
Source: Royal Society of Chemistry journal article supplement (doi:10.1039/d2ma00124a), 2022-01-01
Supplement: d2ma00124a1.pdf [file d2ma00124a1.pdf]

## Supporting information

### **Tuning electromechanical properties of dielectric elastomers via dynamic ionic crosslinks**

Xiao Hu<sup>a,b</sup>, Runan Zhang<sup>c</sup>, Alan M. Wemyss<sup>b</sup>, Mohamed A. El Bannad<sup>d</sup>, Ellen L. Heeley<sup>e</sup>, Mustafa Arafat<sup>d</sup>, Chris Bowen<sup>e</sup>, Shifeng Wang<sup>f</sup>, Xueyu Geng<sup>b\*</sup>, Chaoying Wan<sup>a\*</sup>

<sup>a</sup> International Institute for Nanocomposites Manufacturing (IINM), WMG, University of Warwick, CV4 7AL, UK

<sup>b</sup> School of Engineering, University of Warwick, CV4 7AL, UK

<sup>c</sup> Department of Mechanical Engineering, University of Bath, BA2 7AY, UK

<sup>d</sup> Department of Mechanical Engineering, American University in Cairo, New Cairo 11835, Egypt

<sup>e</sup> School of Life, Health and Chemical Sciences, The Open University, MK7 6AA, UK

<sup>f</sup> School of Chemistry and Chemical Engineering, Shanghai Jiao Tong University, 200240, China

\*Corresponding authors at: International Institute for Nanocomposites Manufacturing (IINM) (C. Wan), WMG, University of Warwick, CV4 7AL, UK; School of Engineering (X. Geng), University of Warwick, CV4 7AL, UK. E-mail address: Chaoying.Wan@warwick.ac.uk (C. Wan), Xueyu.Geng@warwick.ac.uk (X. Geng)

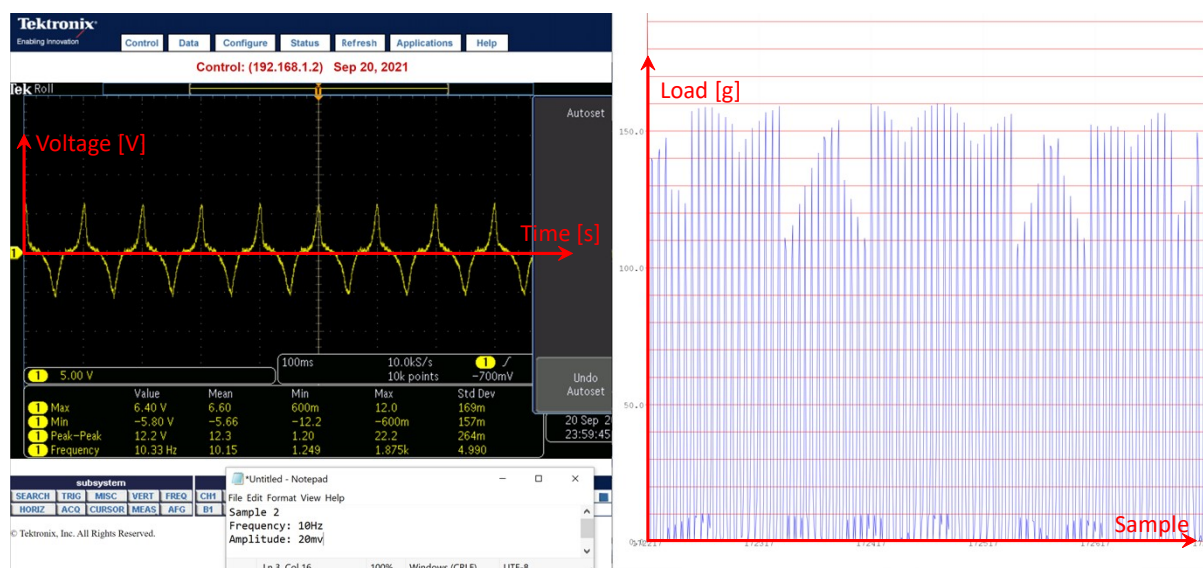

Figure S1 Example of the output of the oscilloscope and Arduino

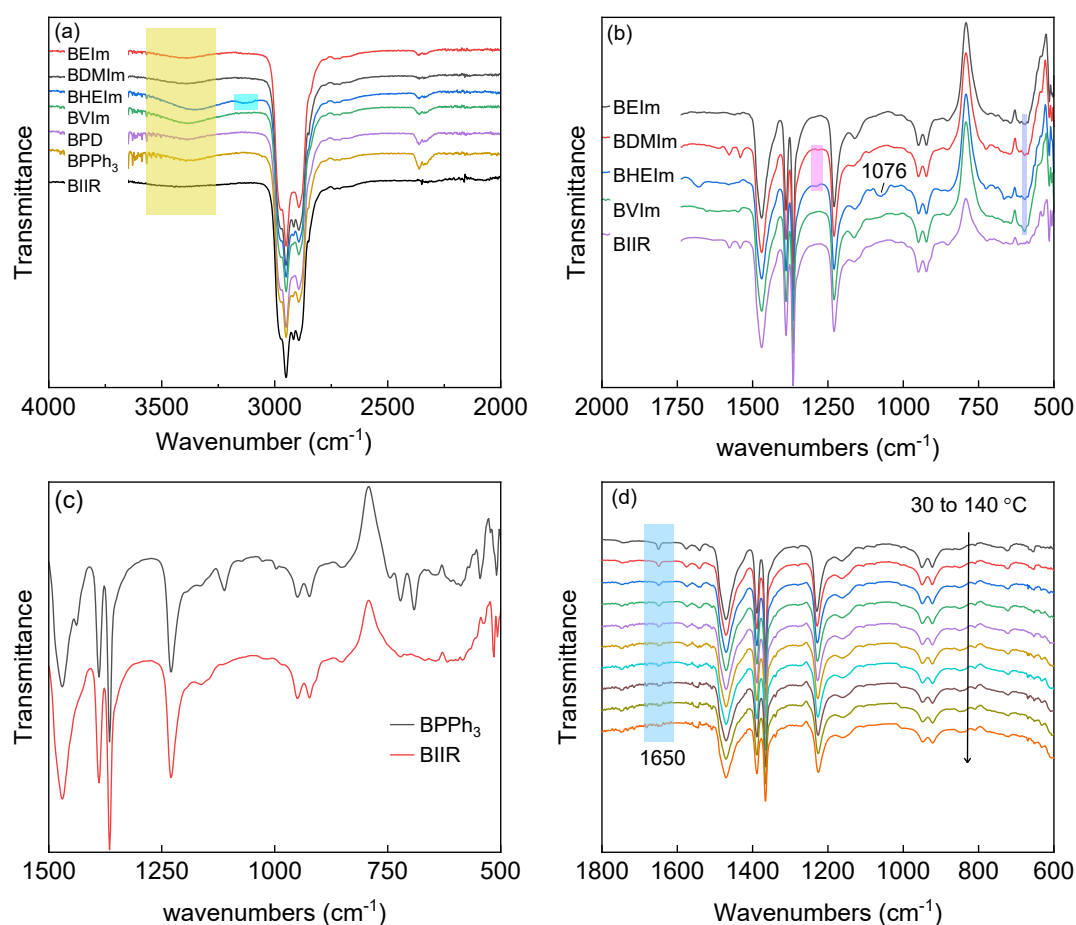

Figure S2 (a) FTIR spectra (measured at 30 °C) of BIIR and BEIm, BDMIm, BHEIm, BVIm, BPD and BPPH<sub>3</sub> gels after dissolving in toluene for 96 h and drying in 50 °C vacuum for 96h at 4000 ~2000 cm<sup>-1</sup>, (b) FTIR spectra (measured at 30 °C) of BIIR and BEIm, BDMIm, BHEIm and BVIm gels after

dissolving in toluene for 96h and drying in 50 °C vacuum for 96h at 2000 ~500  $\text{cm}^{-1}$ , (c) FTIR spectra (measured at 30 °C) of BIIR and BPPH<sub>3</sub> gel after dissolving in toluene for 96h and drying in 50 °C vacuum for 96 h at 1500 ~500  $\text{cm}^{-1}$ , (d) the temperature dependent FTIR spectra of BVIm mixture at 1800 ~600  $\text{cm}^{-1}$  from 30 to 140 °C

As shown in Figure S2 (a) to (c), the alkylation of nucleophiles on the molecule of BIIR can be confirmed by following peaks:

- (1) BEIm: the peaks at 3580 to 3250  $\text{cm}^{-1}$  (assigned to the N-H vibration), the peak at 662  $\text{cm}^{-1}$  (assigned to out-of-plane deformation of the imidazole ring);
- (2) BDMIm: the peaks at 3580 to 3250  $\text{cm}^{-1}$  and 662  $\text{cm}^{-1}$ , and the weak peak at 1286  $\text{cm}^{-1}$  (assigned to the combination of C-H stretching and out-of-plane bending of C-N on the imidazole ring).
- (3) BHEIm: the peaks at 3580 to 3250  $\text{cm}^{-1}$ , 1286  $\text{cm}^{-1}$  and 662  $\text{cm}^{-1}$ , and the peak 3132  $\text{cm}^{-1}$  (attributed to C-H vibration of the imidazole ring).
- (4) BVIm: the peak at 3580 to 3250  $\text{cm}^{-1}$  and 662  $\text{cm}^{-1}$
- (5) BPD: the peak at 3580 to 3250  $\text{cm}^{-1}$
- (6) BPPH<sub>3</sub>: the peak at 3580 to 3250  $\text{cm}^{-1}$ , the peaks at 1439, 1111 and 692  $\text{cm}^{-1}$  (assigned to C-C out-of-plane vibration on the benzene ring), and the peak at 746  $\text{cm}^{-1}$  (attributed to out-of-plane C-H vibration on the benzene ring).

As shown in Figure S3 (d), the peak at 1650  $\text{cm}^{-1}$  of BVIm is assigned to C=C vibration of BIIR molecules, which becomes weak due to the free radical polymerization triggered during the heat process, indicating the decrease of C=C caused by covalent crosslinking.

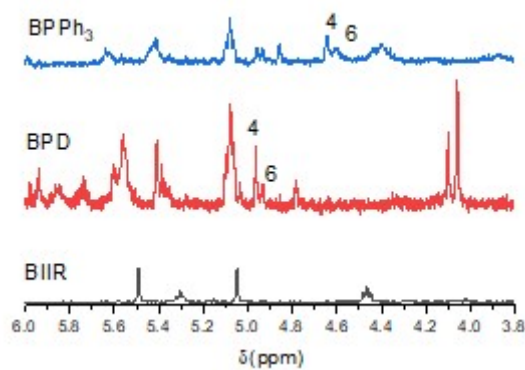

Figure S3. The olefin region of <sup>1</sup>H NMR spectra of pure BIIR, BPD and BPPH<sub>3</sub>.

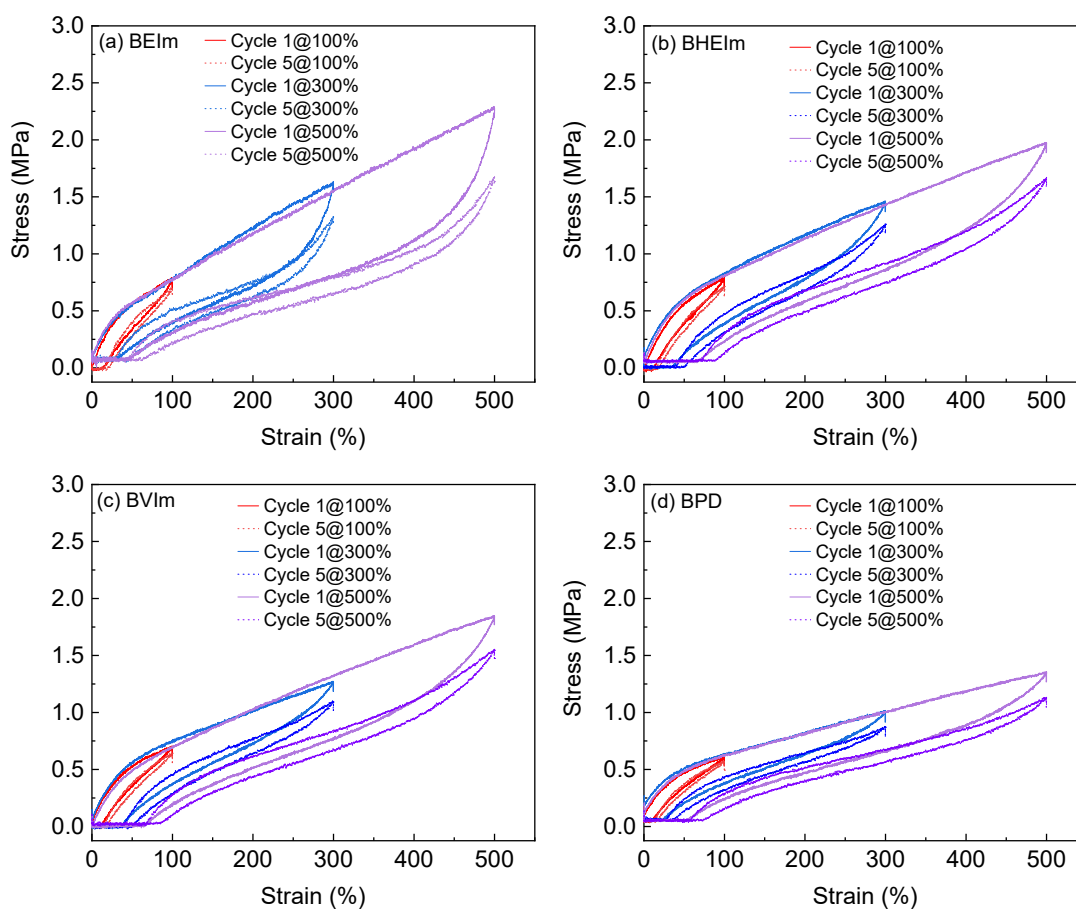

Figure S4 Cyclic tensile curve of (a) BEIm, (b) BHEIm, (c) BVIm, and (d) BPD with the maximum strain at 100%, 300% and 500%

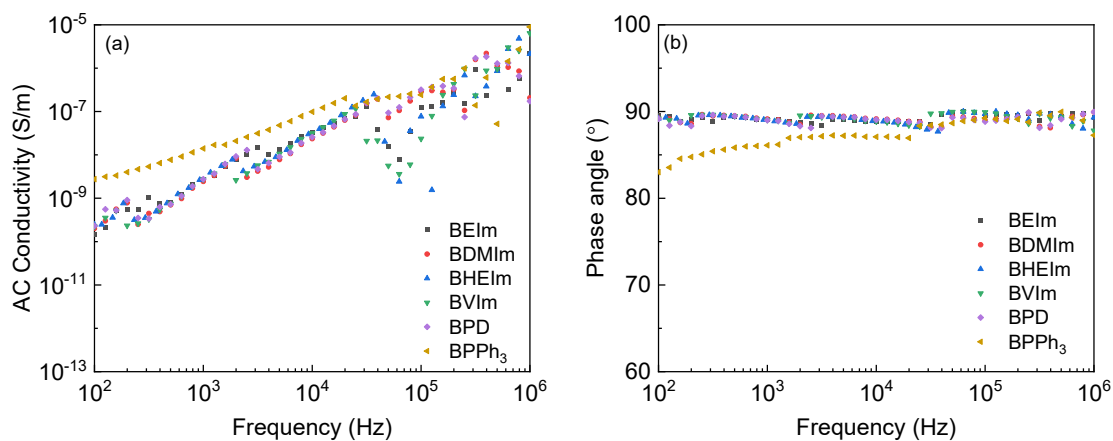

Figure S5 (a) Conductivity and (b) phase angle vs frequency curves of BIIR ionomers.
